# Supplementary material for: A nitrogenous pre-intercalation strategy for the synthesis of nitrogen-doped Ti3C2Tx MXene with enhanced electrochemical capacitance
Source: Royal Society of Chemistry journal article supplement (doi:10.1039/d0ta11907e), 2021-01-01
Supplement: d0ta11907e1.pdf [file d0ta11907e1.pdf]

Electronic supplementary information

for

**A Nitrogenous Pre-Intercalation Strategy for the Synthesis of Nitrogen-Doped  $\text{Ti}_3\text{C}_2\text{T}_x$  MXene with Enhanced Electrochemical Capacitance**

*Fangli Yang,<sup>1</sup> Dylan Hegh,<sup>1</sup> Dongxing Song,<sup>2</sup> Jizhen Zhang,<sup>1</sup> Ken Aldren S. Usman,<sup>1</sup> Zhiyu Wang,<sup>1</sup> Peng Zhang,<sup>1</sup> Weigang Ma,<sup>2\*</sup> Wenrong Yang,<sup>3</sup> Si Qin,<sup>1\*</sup> Joselito M. Razal<sup>1\*</sup>*

<sup>1</sup> Institute for Frontier Materials, Deakin University, Geelong, VIC, 3216, Australia.

<sup>2</sup> Key Laboratory for Thermal Science and Power Engineering of Ministry of Education, Department of Engineering Mechanics, Tsinghua University, Beijing 100084, China.

<sup>3</sup> School of Life and Environmental Sciences, Deakin University, Geelong, Victoria 3216, Australia.

### **Fabrication of MXene electrode**

A glassy carbon electrode (GCE) (3 mm in diameter) was firstly polished, rinsed with deionized water, and then dried under a stream of nitrogen gas. MXene powder was sonicated for 30 minutes in deionized water to obtain a homogeneous MXene dispersion. The MXene dispersion (4 uL, 2 mg mL<sup>-1</sup>) was dropped on the GCE and dried in vacuum for 30 min at room temperature. Then 3 uL of nafion solution (5 wt % in ethanol) was dropped on the MXene/GCE and dried in vacuum at room temperature to ensure a good adhesion.

### **Characterization**

The interlayer space  $d$  was calculated from the **Bragg's Law**

$$n\lambda = 2d\sin\theta$$

Where,  $n=1$  with Cu K $\alpha$  radiation ( $\lambda = 0.15406$  nm)

From the CV curve, the gravimetric capacitance (C, F g<sup>-1</sup>) of the electrode can be calculated as the following equation,

$$C = \frac{\int I_m dU}{V\Delta E}$$

Where  $I_m$  is the charge/discharge mass current density,  $V$  is the potential scan rate (V s<sup>-1</sup>) and  $\Delta E$  is the potential window (V) of the initial and final potential either on charging or discharging process.

From the galvanostatic charge discharge curve, the capacitance can be calculated from the following formula,

$$C = Q/\Delta E$$

Where  $Q = I \cdot \Delta t$ ,  $Q$  is the total charge stored or released by the supercapacitor,  $I$  is the applied current and  $\Delta t$  is the charge/discharge duration,  $\Delta E$  is the voltage difference between the initial and final potential either on charging or discharging process.

The formula for formation energy in manuscript.

In general, the formation energy,  $E_{form}$ , of a compound is defined as,

$$E_{form} = E_{comp} - \sum_{i=1}^n N_i E_i, \quad (1)$$

Where  $E_{comp}$  is the total energy of the compound,  $n$  is the number of elements in the compound,  $N_i$  is the number of atoms of  $i^{\text{th}}$  element, and  $E_i$  is the total energy per atom of the most stable elemental of  $i^{\text{th}}$  element. And the formation energy per atom,  $E_{form,per\_atom}$ , can be obtained

by  $\frac{E_{form}}{\sum_{i=1}^n N_i}$ . Here, to reflect the formation energy variation of MXene during nitrogen adsorption or substitution, we define  $\Delta E_{form}$  as,

$$\Delta E_{form} = \begin{cases} E_{form}(MXene + N) - E_{form}(MXene + N) & \text{initial} \\ E_{form}(vacancy\_MXene + N + replaced\_group) - E_{form}(MXene + N) & \text{for transitional states} \\ E_{form}(N\_MXene + replaced\_group) - E_{form}(MXene + N) & \text{final} \end{cases} \quad (2)$$

where  $E_{form}(MXene+N)$  indicates the formation energy of the system containing pure MXene and a dissociative nitrogen atom,  $E_{form}(vacancy-MXene+N+replaced\_group)$  means that containing MXene with vacancy, dissociative nitrogen atom and the replaced group (such as C, F, OH and Ti), and  $E_{form}(N-MXene +replaced\_group)$  represents that containing nitrogen doped MXene and the dissociative replaced group, as shown in the following Fig.S1.

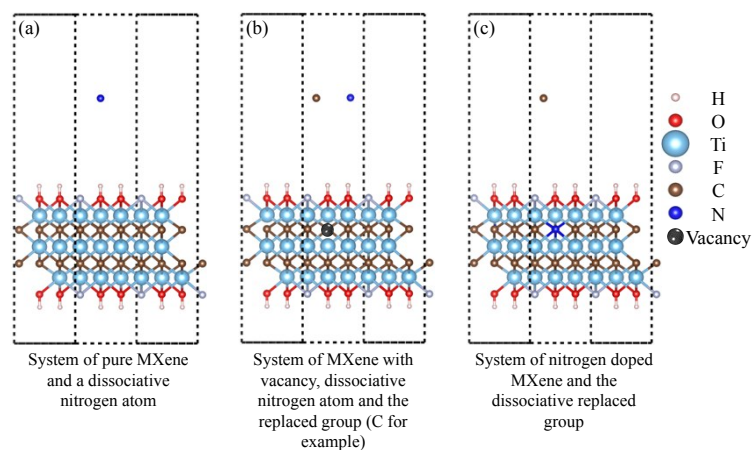

Fig.S1 Models of the systems for the calculation of  $\Delta E_{\text{form}}$ .

## Characterisation

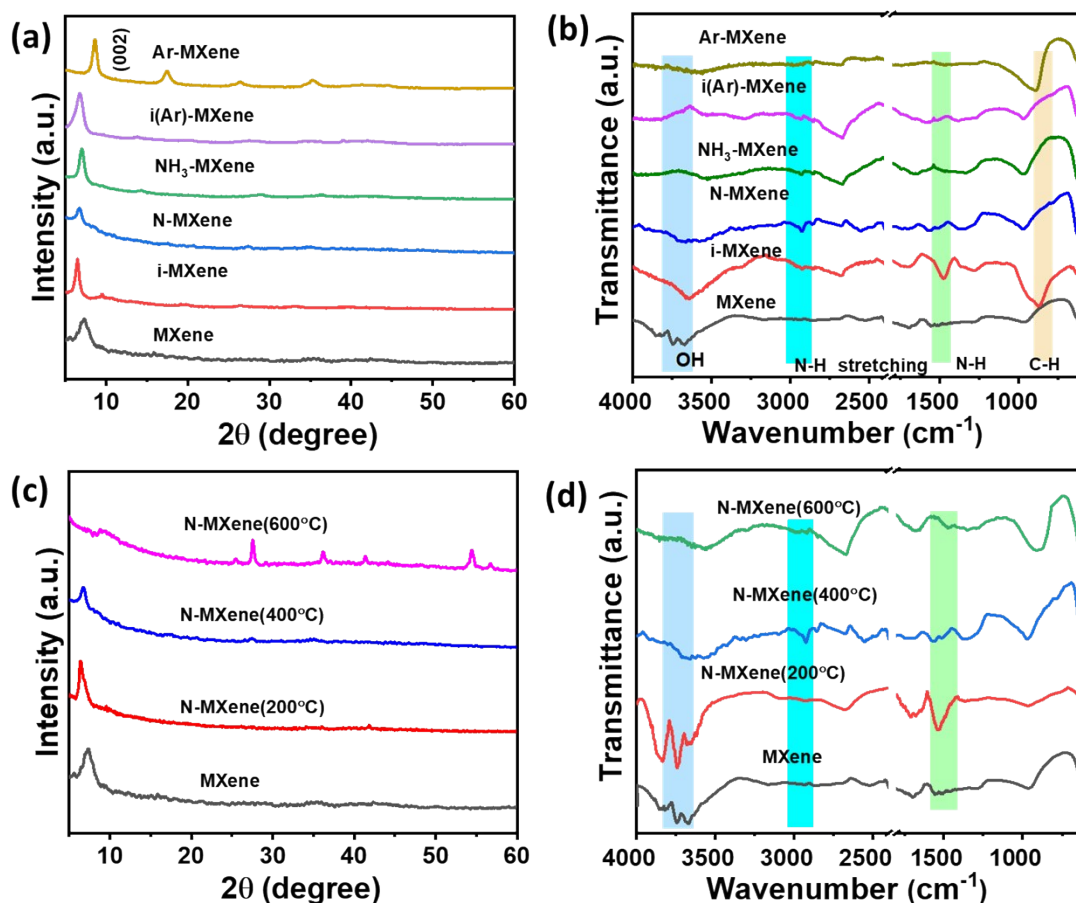

Fig. S2. (a–b) The XRD and FTIR profiles of different samples. (c–d) The XRD and FTIR of N-MXene at different temperature obtained in 1M  $\text{H}_2\text{SO}_4$ .

**Table S1.** The interlayer spacing (d) of MXene samples with different treatment methods calculated from XRD.

| Sample                 | Parameters<br>(002) position<br>(2 $\theta$ degree) | d (nm) |
|------------------------|-----------------------------------------------------|--------|
| MXene                  | 7.2                                                 | 1.23   |
| i-MXene                | 6.6                                                 | 1.36   |
| N-MXene                | 6.7                                                 | 1.32   |
| NH <sub>3</sub> -MXene | 7.0                                                 | 1.26   |
| i(Ar)-MXene            | 6.9                                                 | 1.28   |
| Ar-MXene               | 8.4                                                 | 1.05   |

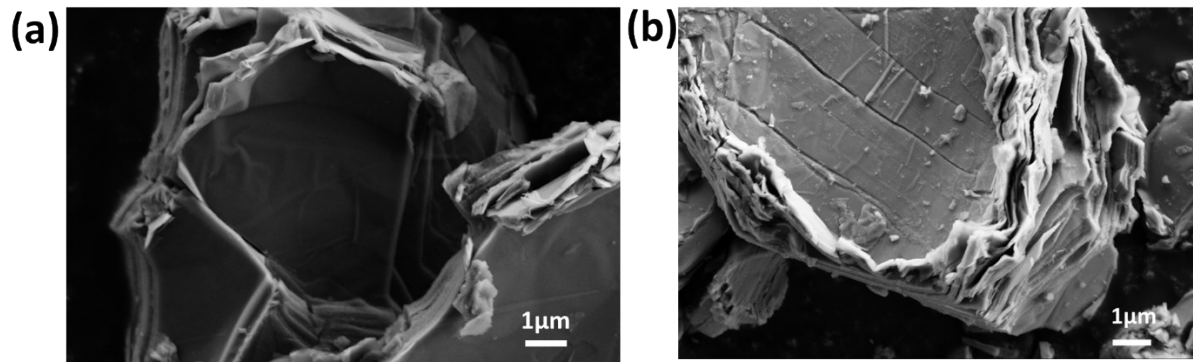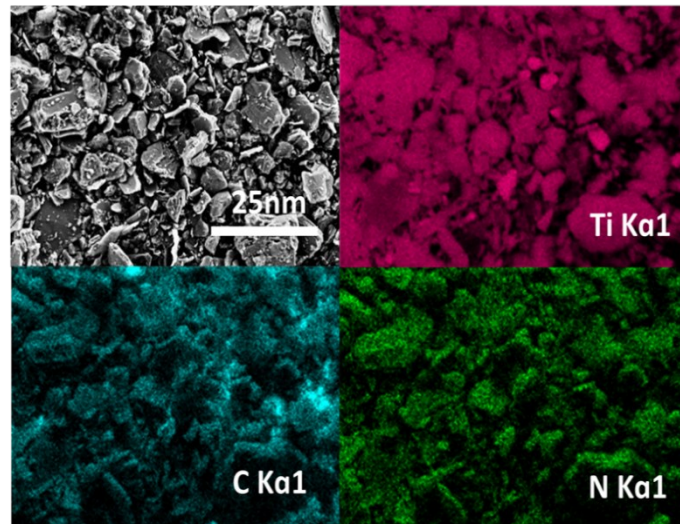

**Fig. S3.** SEM of MXene and N-MXene. (c) EDS images showing the morphology of N-MXene.

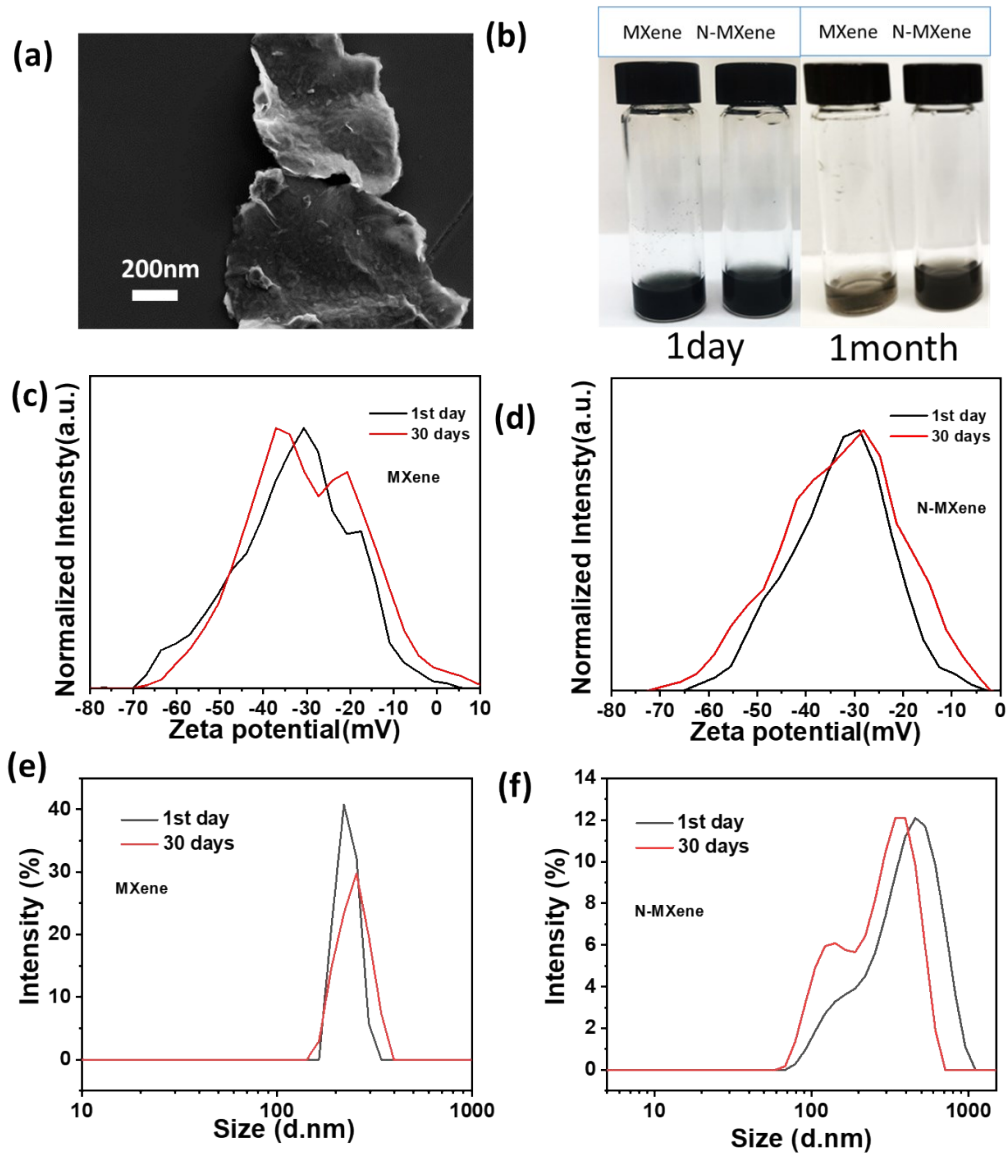

**Fig. S4** (a) SEM of N-MXene. (b) The color change and (c, d) zeta potential of MXene and N-MXene before and after storage for 30 days in air at room temperature. (e, f) The particle size distribution of MXene and N-MXene from DLS.

The MXenes were aged to test shelf stability and resistance to oxidation, after being stored for 30 days under ambient conditions. Unlike MXene, N-MXene retained a near black hue (Fig. 3c)

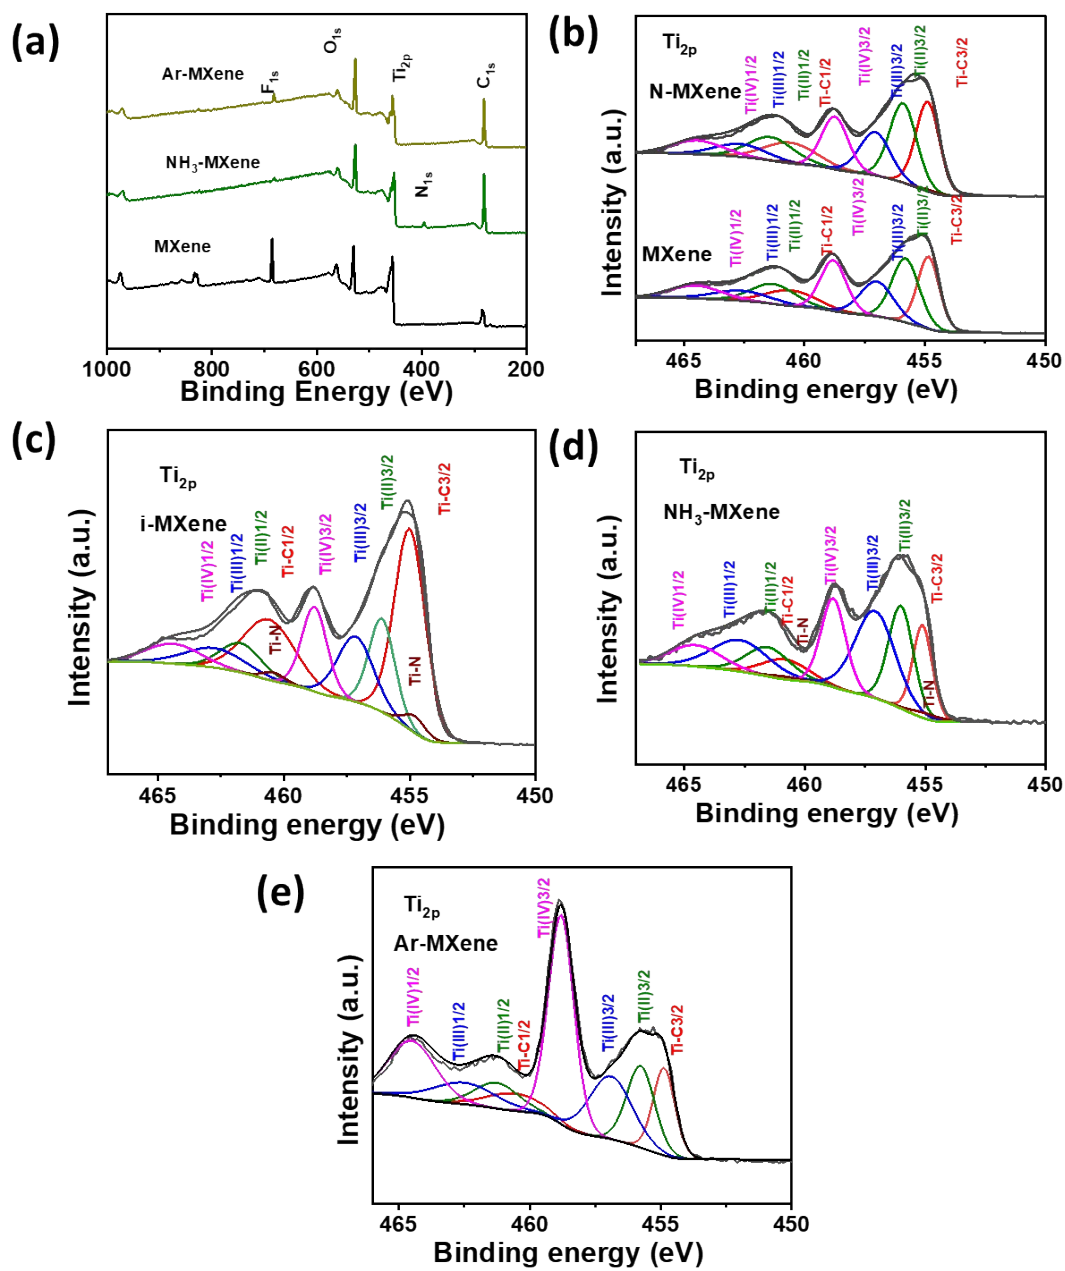

**Fig. S5.** (a) XPS spectra of Ar-MXene and NH<sub>3</sub>-MXene, (b-e) Ti<sub>2p</sub> spectra of MXene, N-MXene, i-MXene, NH<sub>3</sub>-MXene and Ar-MXene.



**Table S2.** Elemental Nitrogen content of all MXenes.

| Samples          | MXene | i-MXene | N-MXene | NH <sub>3</sub> -MXene | Ar-MXene |
|------------------|-------|---------|---------|------------------------|----------|
| N content (at %) | -     | 3.2%    | 6.3%    | 3.6%                   | -        |

**Table S3.** The Nitrogen element content the N-MXene characterisation by XPS.

| N content (at %) | SA nitrogen (401.7 eV, at %) | SF nitrogen (399. eV, at %) | LS nitrogen (396.1 eV, at %) |
|------------------|------------------------------|-----------------------------|------------------------------|
| 6.31 %           | 80.35 %                      | 8.68 %                      | 10.97%                       |

**Table S4.** Peak fitting results of high-resolution XPS spectra in the Ti<sub>2p</sub> region for as-synthesised MXene and N doped MXene samples.

| Sample                          | Binging energy (eV) | FWHM | Assignment | Percent (%) |
|---------------------------------|---------------------|------|------------|-------------|
| MXene<br>Ti 2p <sub>3/2</sub>   | 455.8               | 1.35 | Ti(II)     | 30.4        |
|                                 | 454.8               | 1.06 | Ti-C       | 27.1        |
|                                 | 458.8               | 1.26 | Ti(IV)     | 22.6        |
|                                 | 457.0               | 1.61 | Ti(III)    | 19.9        |
| N-MXene<br>Ti 2p <sub>3/2</sub> | 454.8               | 1.15 | Ti-C       | 30          |
|                                 | 455.9               | 1.31 | Ti(II)     | 30.6        |
|                                 | 457.1               | 1.49 | Ti(III)    | 18.9        |
|                                 | 458.7               | 1.29 | Ti(IV)     | 19.8        |
|                                 | 454.8               | 0.99 | Ti-N       | 0.6         |

## Electrochemical Data

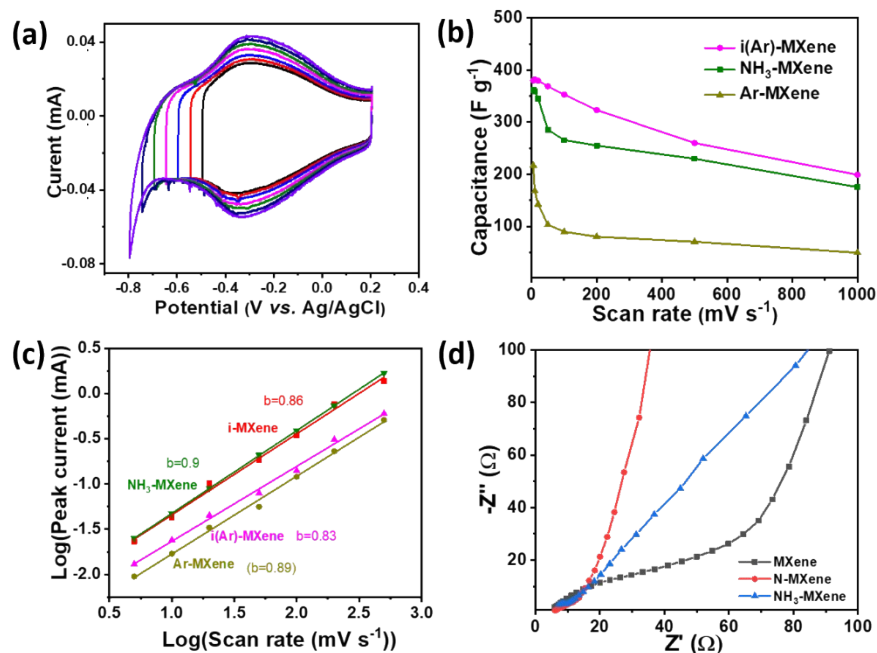

**Fig. S6.** (a) CV plots of N-MXene in 1 M H<sub>2</sub>SO<sub>4</sub> electrolyte at different potentials. (b) Specific capacitances of different MXene samples in H<sub>2</sub>SO<sub>4</sub> electrolyte at different scan rate. (c) Logarithmic dependence of discharge peak current (*i<sub>p</sub>*) versus scan rate of different MXene samples. (d) The EIS results of MXene, N-MXene and NH<sub>3</sub>-MXene obtained in 1 M H<sub>2</sub>SO<sub>4</sub>.

**Table S5.** The capacitance of samples with different treatment methods calculated from CV at 5 mV s<sup>-1</sup>.

| Sample                 | Capacitance (F g <sup>-1</sup> ) |
|------------------------|----------------------------------|
| MXene                  | 321                              |
| i-MXene                | 351                              |
| N-MXene                | 475                              |
| NH <sub>3</sub> -MXene | 362                              |
| i(Ar)-MXene            | 380                              |
| Ar-MXene               | 217                              |

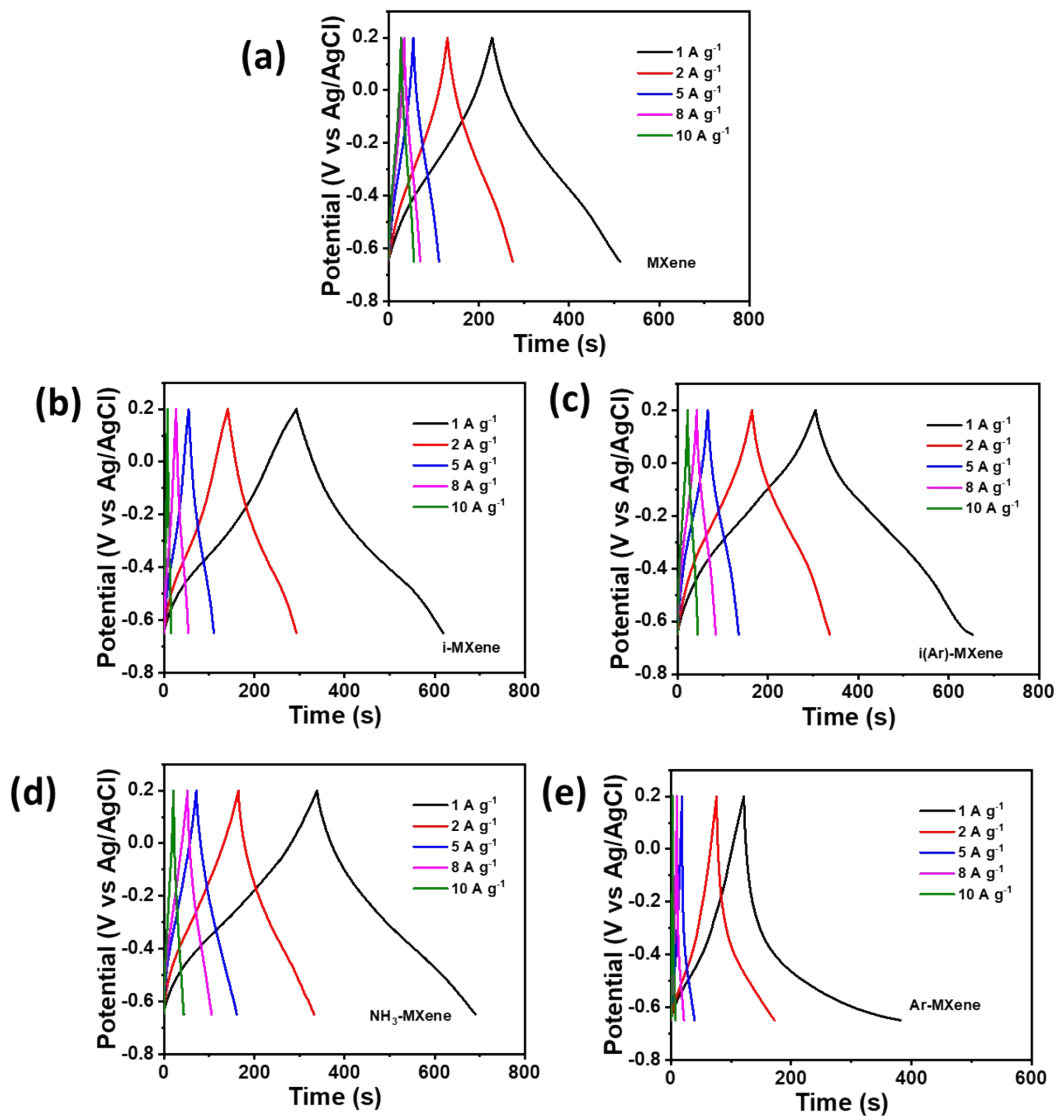

**Fig. S7.** Galvanostatic charging-discharging curve of MXene samples at different current density (1 A g<sup>-1</sup> to 10 A g<sup>-1</sup>).

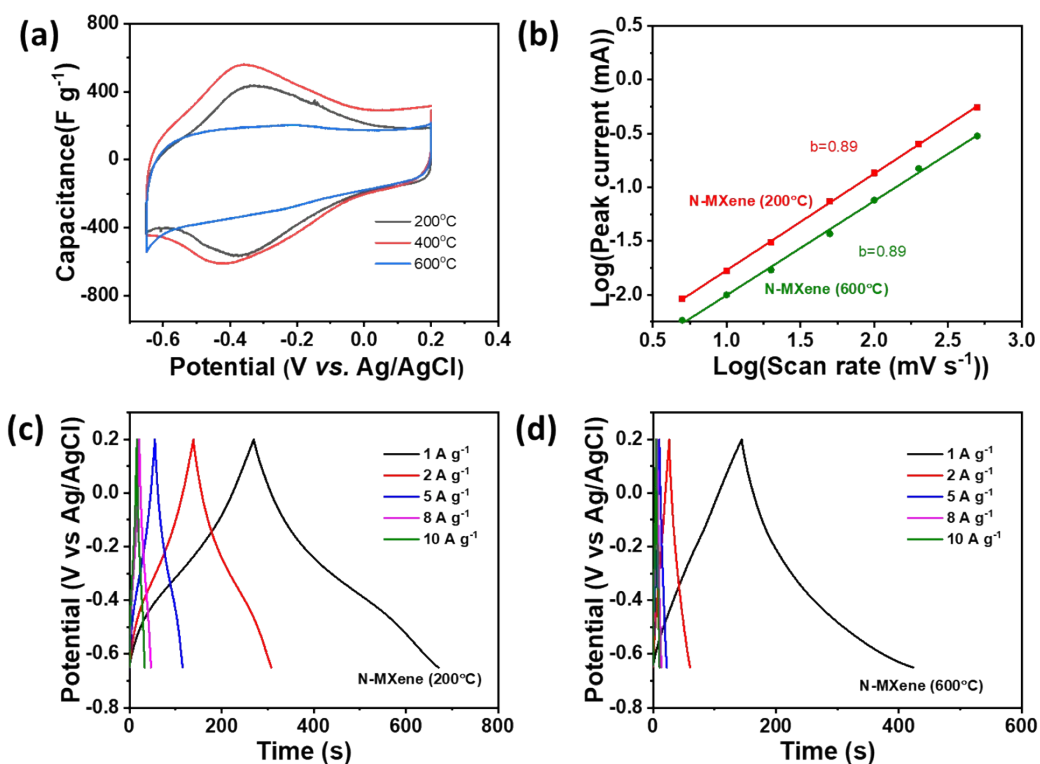

**Fig. S8.** (a) The CV curves of N-MXene at different temperatures at 5mV s<sup>-1</sup> obtained in 1M H<sub>2</sub>SO<sub>4</sub>. (b) Galvanostatic charging-discharging curve of N-MXene (200 °C and 600 °C) samples at different current density (1 A g<sup>-1</sup> to 10 A g<sup>-1</sup>). (c) and (d) Galvanostatic charging-discharging curve of N-MXene (200 °C and 600 °C) samples at different current density (1 A g<sup>-1</sup> to 10 A g<sup>-1</sup>).

## Simulation Data

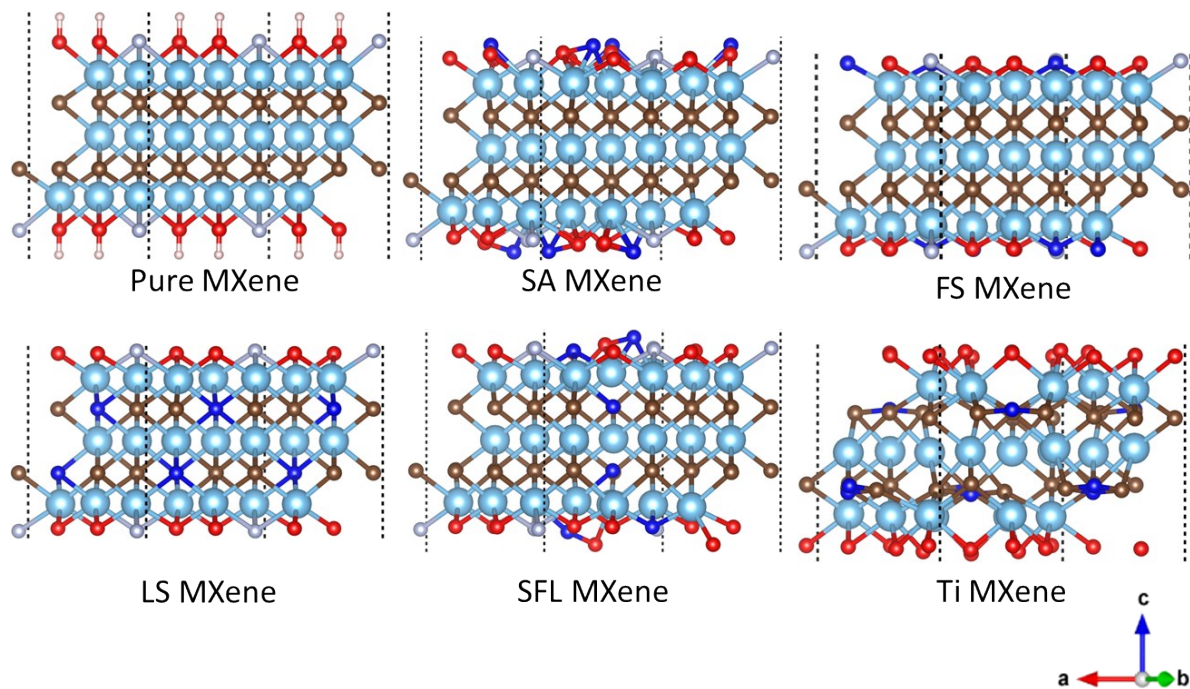

**Fig. S9.** DFT Simulation. Atomic schemes of MXene with all possible sites for nitrogen dopants.

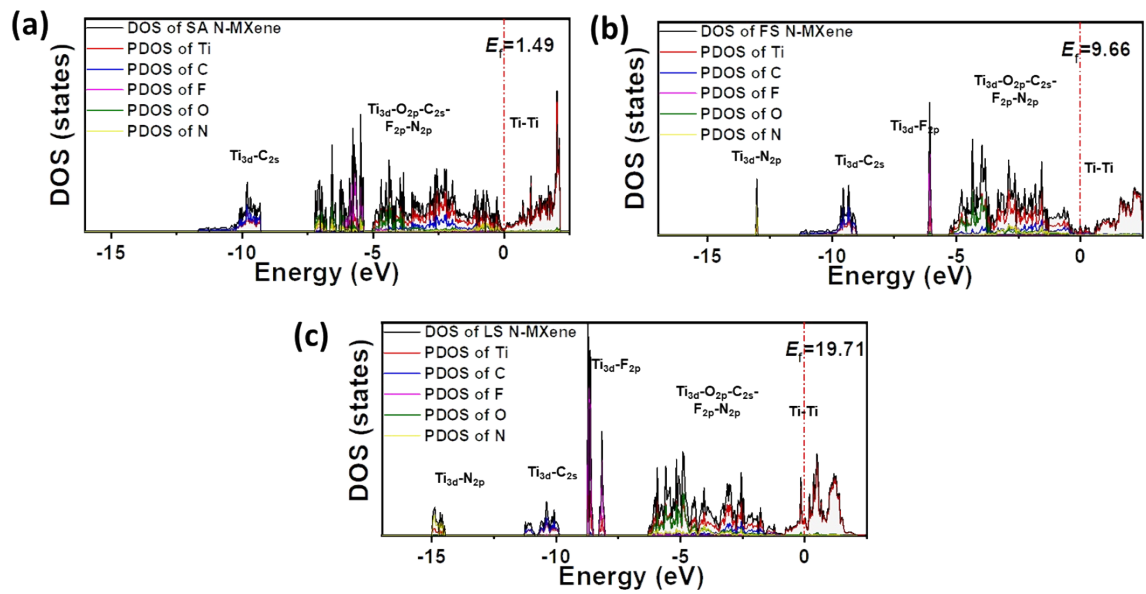

**Fig. S10.** The computed electron density of states (DOS) of (a) SA, (b) FS, (c) LS-N-MXene.

**Table S6.** Number of atoms of each different element used in MXene model

| Elements | Pristine-MXene | SA N-MXene | FS N-MXene | LS N-MXene | SFL N-MXene |
|----------|----------------|------------|------------|------------|-------------|
| Ti       | 27             | 27         | 27         | 27         | 27          |
| C        | 18             | 18         | 18         | 12         | 16          |
| F        | 6              | 6          | 2          | 6          | 5           |
| O        | 12             | 12         | 10         | 12         | 11          |
| H        | 12             | 0          | 0          | 0          | 0           |
| N        | --             | 6          | 6          | 6          | 6           |

**Table S7.** The average valance of the elements in MXene

| Elements | Pristine-MXene | SA N-MXene | FS N-MXene | LS N-MXene | SFL N-MXene |
|----------|----------------|------------|------------|------------|-------------|
| Ti       | 1.527          | 1.60       | 1.63       | 1.63       | 1.61        |
| C        | -1.61          | -1.52      | -1.45      | -1.55      | -1.55       |
| F        | -0.75          | -0.68      | -0.69      | -0.67      | -0.67       |
| O        | -1.26          | -0.83      | -0.99      | -1.05      | -0.87       |
| H        | 0.61           | --         |            |            | --          |
| N        | --             | -0.30      | -1.10      | -1.48      | -0.97       |

**Table S8.** The increments of available orbits of O and Ti

| Element | Pure-MXene | SA N-MXene | FS N-MXene | LS N-MXene | SFL N-MXene |
|---------|------------|------------|------------|------------|-------------|
| O       | 0.00       | 0.58       | 0.36       | 0.28       | 0.53        |
| Ti      | 0.000      | 0.046      | 0.065      | 0.065      | 0.052       |

**Table S9.** Collection of the properties of N-MXene in the experiment and simulations comparing to pristine MXene.

| <b>Property</b>           | Experiment | SA-N-MXene | FS-N-MXene | LS-N-MXene | SFL-N-MXene |
|---------------------------|------------|------------|------------|------------|-------------|
| Conductivity              | Green      | Red        | Green      | Green      | Green       |
| Capacitive part           | Green      | Green      | Yellow     | Red        | Green       |
| Diffusion-controlled part | Green      | Red        | Red        | Green      | Green       |

\* Note: Colour green indicates significant enhancements for the capacitances, yellow means moderate enhancements for the capacitances, and red represents poor enhancement.

\*\* Effect on the conductivity was based on DOS results.
